# Supplementary material for: A cationic lipid with advanced membrane fusion performance for pDNA and mRNA delivery
Source: Royal Society of Chemistry journal article supplement (doi:10.1039/d2tb02783f), 2023-01-01
Supplement: d2tb02783f1.pdf [file d2tb02783f1.pdf]

## Supporting Information

A cationic lipid with advanced membrane fusion performance for pDNA and mRNA delivery

*Yu Wei<sup>a, ‡</sup>, Ting He<sup>a, ‡</sup>, Qunjie Bi<sup>a</sup>, Huan Yang<sup>a</sup>, Xueyi Hu<sup>a</sup>, Rongrong Jin<sup>a</sup>, Hong Liang<sup>b, c\*</sup>,  
Yongqun Zhu<sup>d</sup>, Rongsheng Tong<sup>b, c\*</sup>, and Yu Nie<sup>a\*</sup>*

<sup>a</sup> National Engineering Research Center for Biomaterials/College of Biomedical Engineering,  
Sichuan University, Chengdu 610064, China

<sup>b</sup> Department of Pharmacy, Sichuan Academy of Medical Sciences & Sichuan Provincial People's  
Hospital, School of Medicine, University of Electronic Science and Technology of China, Chengdu  
610072, China.

<sup>c</sup> Personalized Drug Therapy Key Laboratory of Sichuan Province, School of Medicine, University  
of Electronic Science and Technology of China, Chengdu 610072, China.

<sup>d</sup> Life Sciences Institute and Innovation Center for Cell Signaling Network, Zhejiang University,  
Hangzhou 310058, China.

<sup>‡</sup> Equal contribution to the manuscript as co-first authors

\* E-mail: nie\_yu@scu.edu.cn; lianghong3689@163.com; 2207132448@qq.com

Fax: +86-28-8541-0246; Tel: +86-28-8541-284



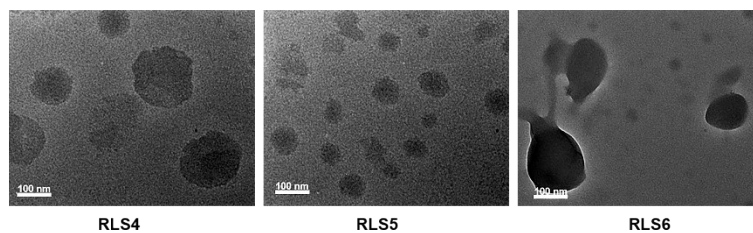

**Figure S5.** Transmission electron microscope (TEM) images of RLS4 (126.4 nm), RLS5 (90.6 nm), and RLS6 (148.1 nm) lipid assemblies. The scale bar was 100 nm.

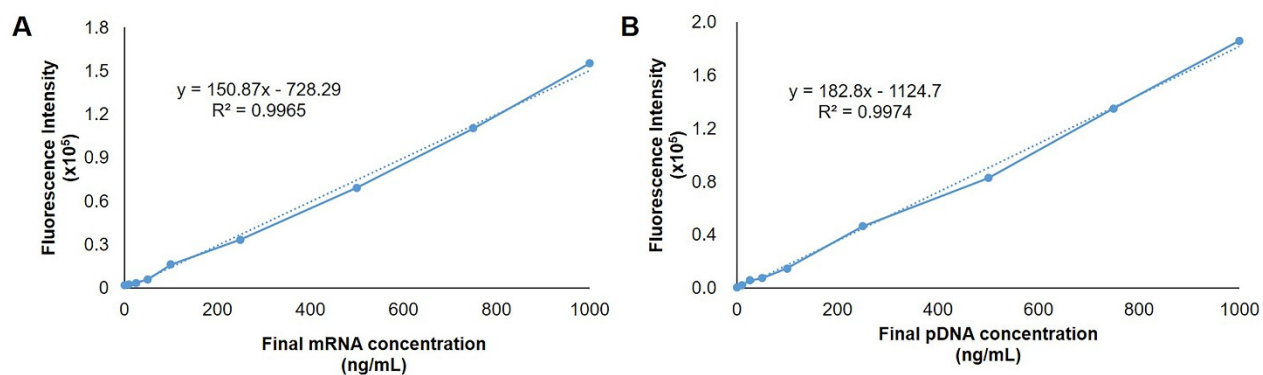

**Figure S6.** The standard curve of mRNA (A) and pDNA (B) by RiboGreen and PicoGreen staining, respectively.

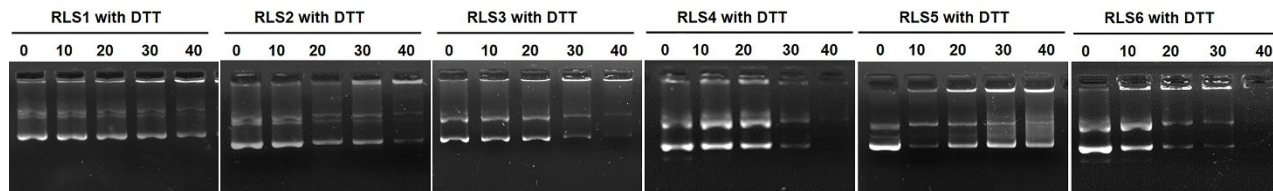

**Figure S7.** Gel retardation assay of cationic assemblies/pDNA complexes at different N/P ratios in the presence of 10 mmol/L DTT.

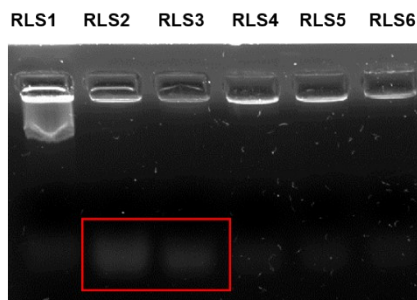

**Figure S8.** Six lipoplexes stability in 10% FBS by gel electrophoresis assays.

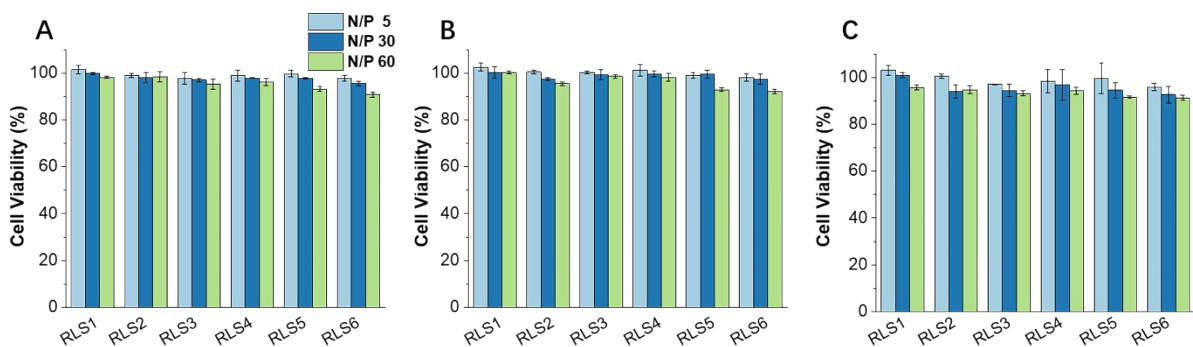

**Figure S9.** The cell viability with 10% FBS of different nanoparticles in HEK293 (A), HepG2 cells (B), and Hela cells (C).

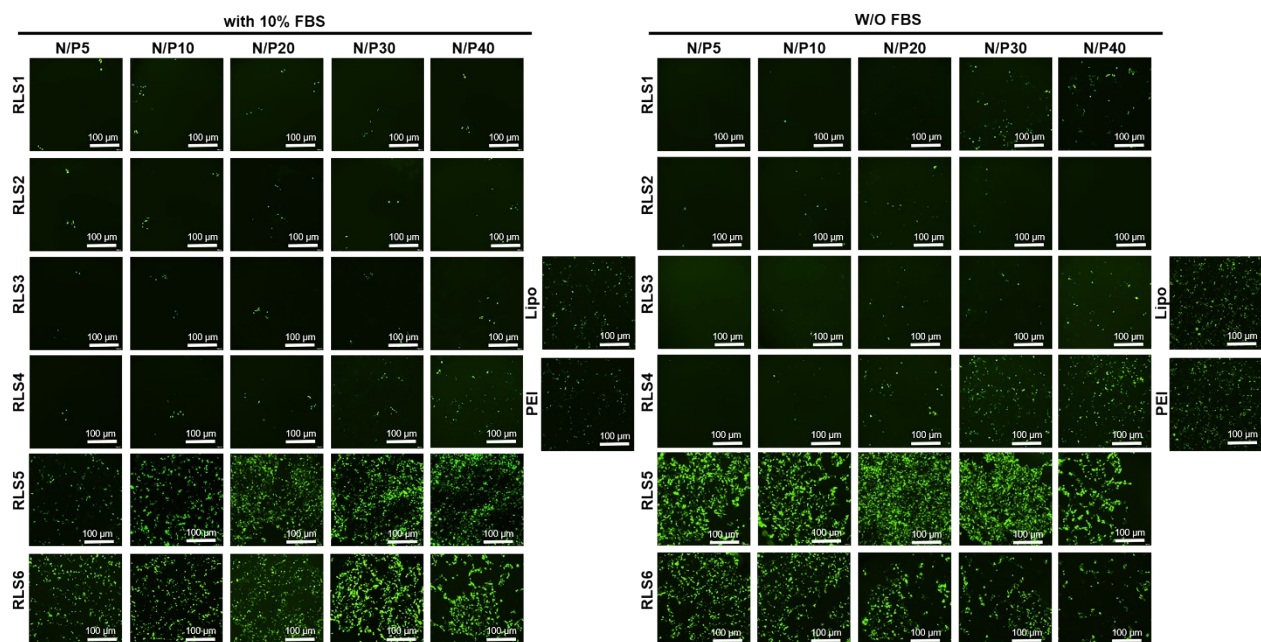

**Figure S10.** Fluorescence microscopy images of cells with pEGFP transfection on HEK-293 cells (W/O: without).

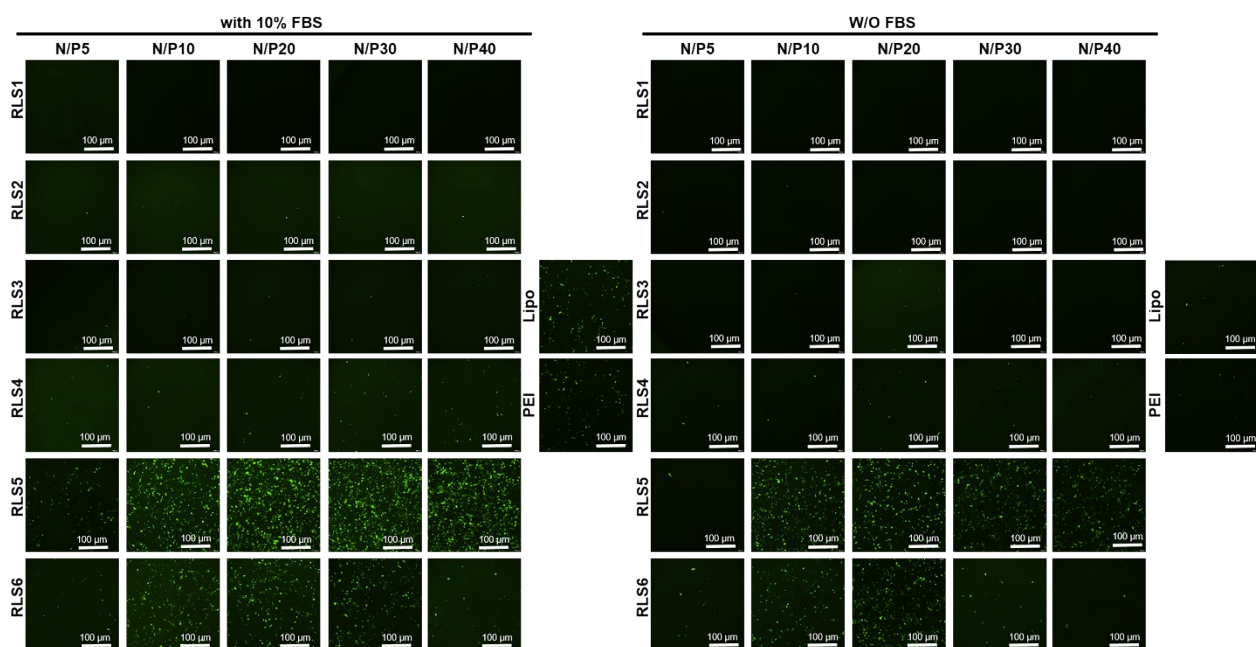

**Figure S11.** Fluorescence microscopy images of cells with pEGFP transfection on HepG2 cells.

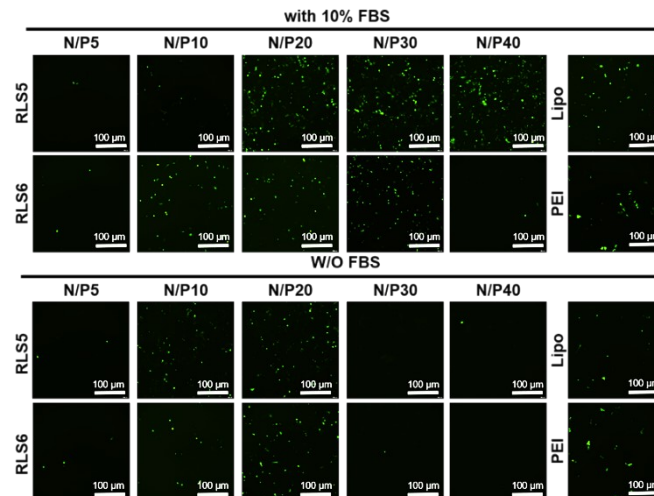

**Figure S12.** Fluorescence microscopy images of cells with pEGFP transfection on HeLa cells.

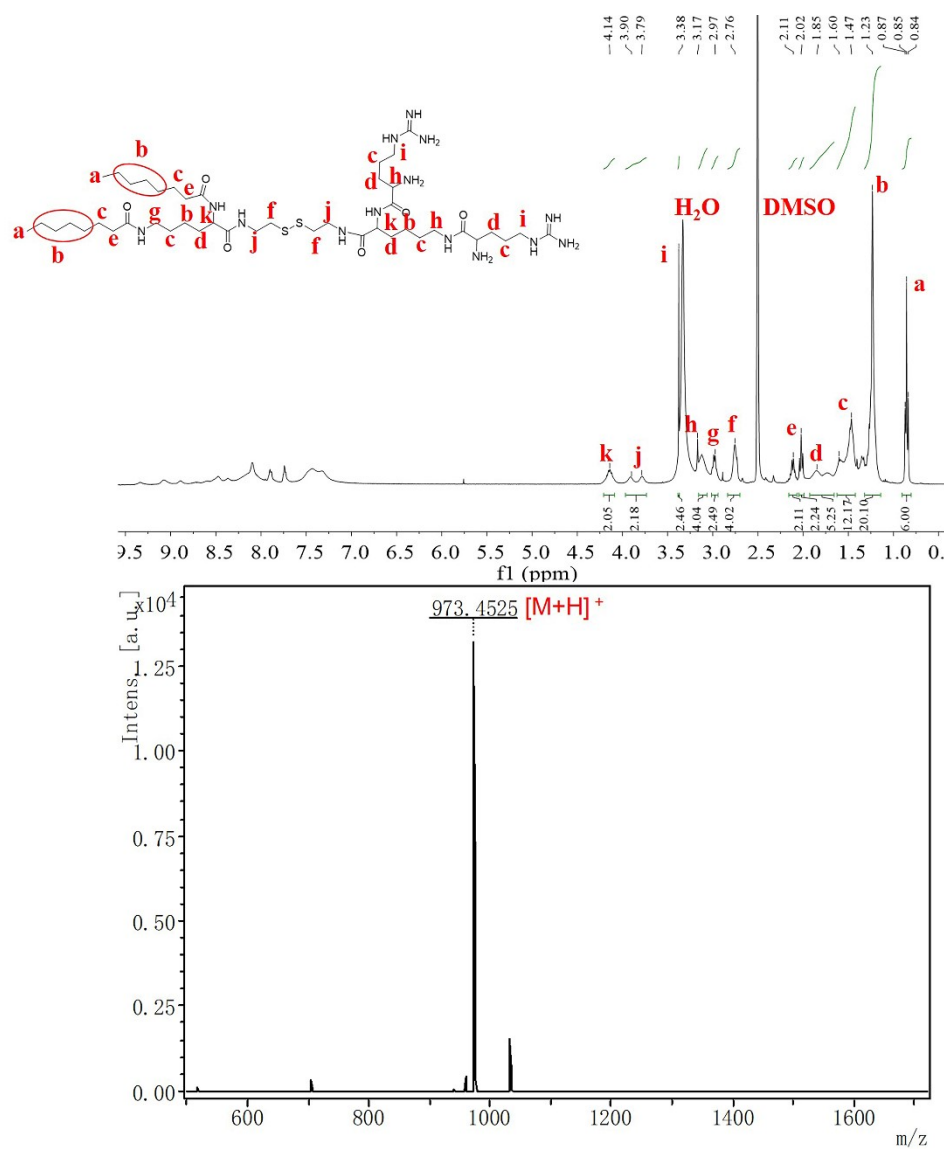

**Figure S13.** (A)  $^1\text{H}$ -NMR of RLS1. (B) MOLDI-TOF-MS of RLS1

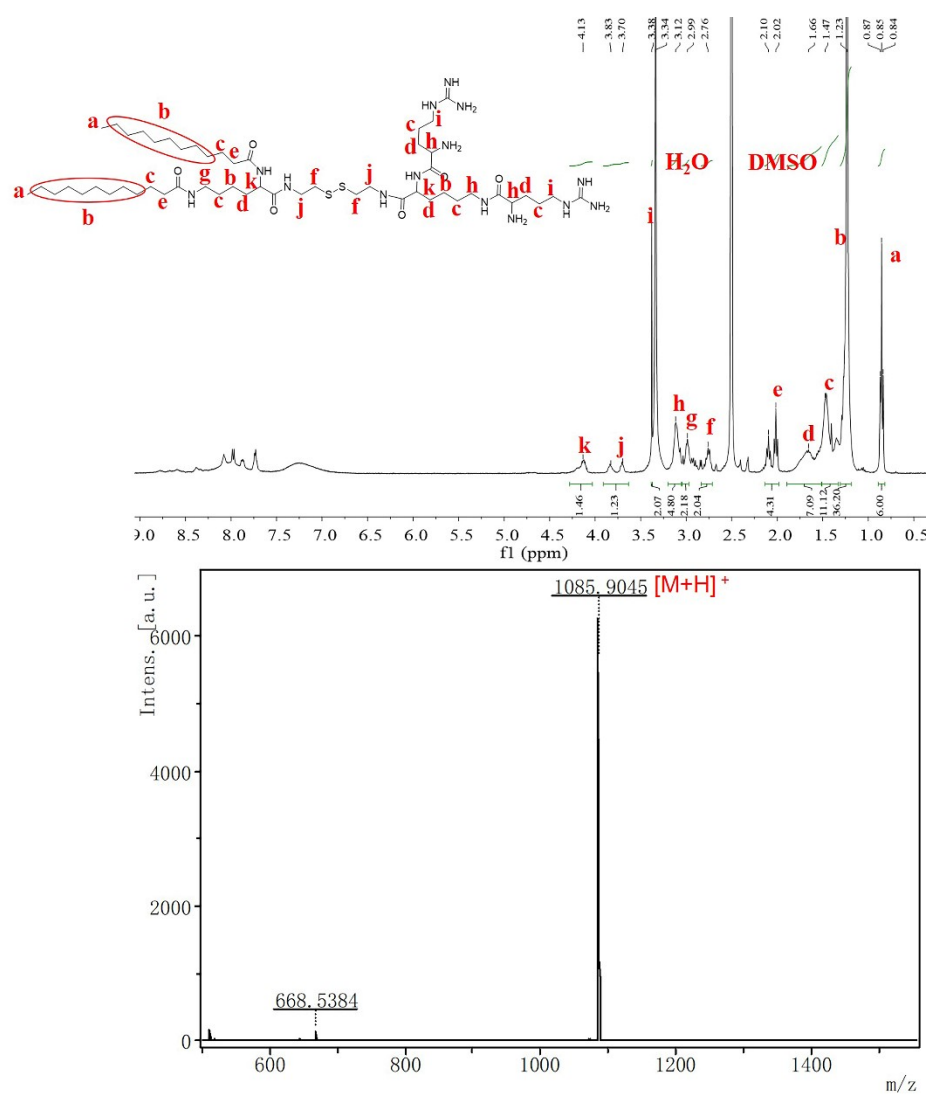

**Figure S14.** (A)  $^1\text{H}$ -NMR of RLS2. (B) MOLDI-TOF-MS of RLS2.



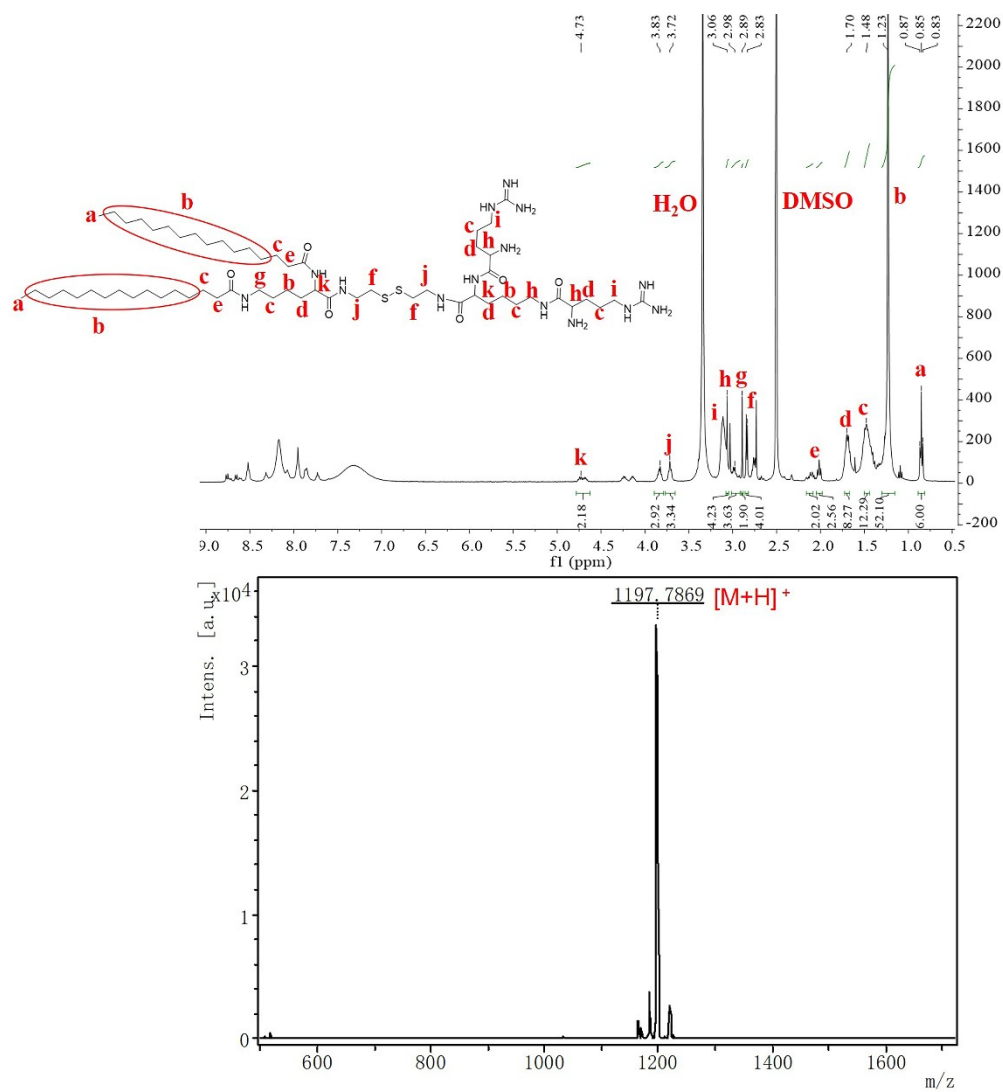

**Figure S15.** (A)  $^1\text{H}$ -NMR of RLS3. (B) MOLDI-TOF-MS of RLS3.

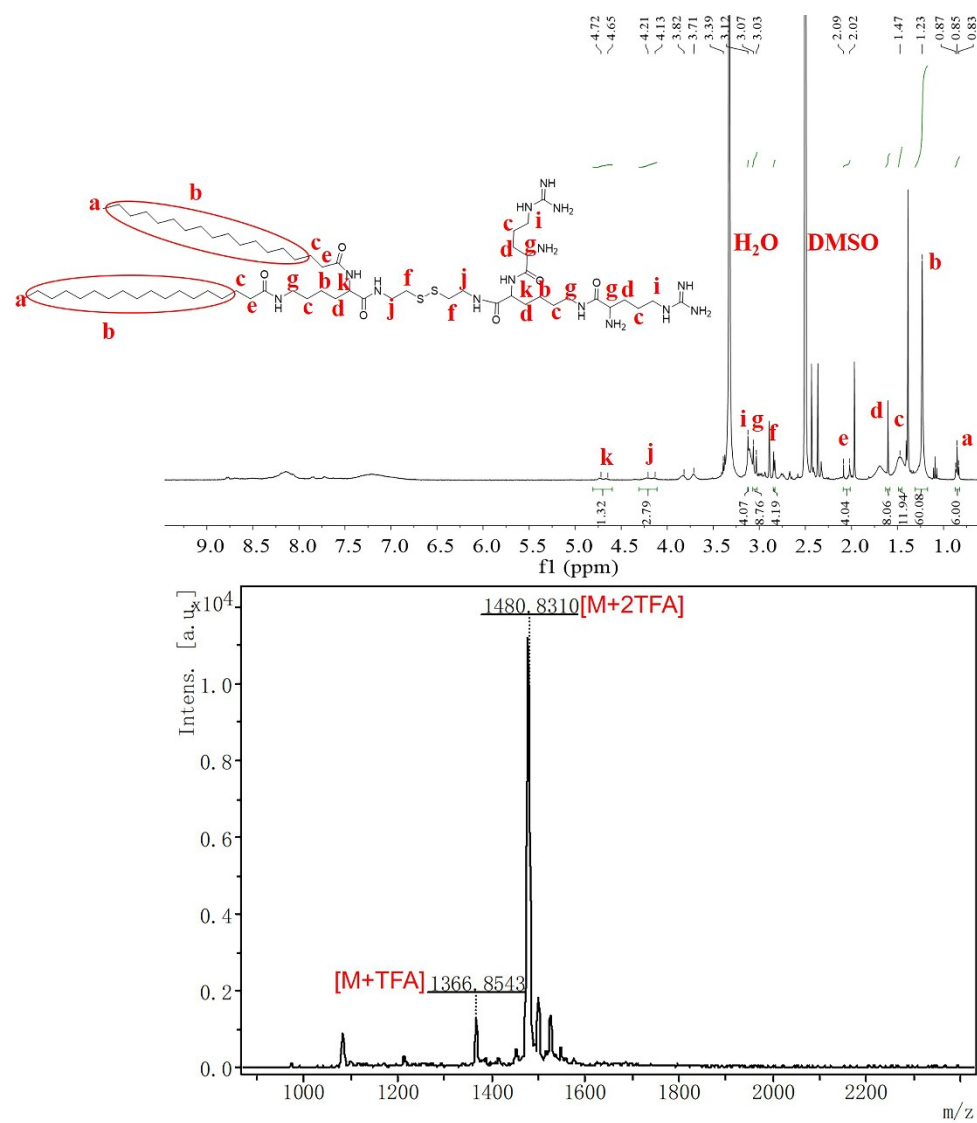

**Figure S16.** (A)  $^1\text{H}$ -NMR of RLS4. (B) MOLDI-TOF-MS of RLS4.

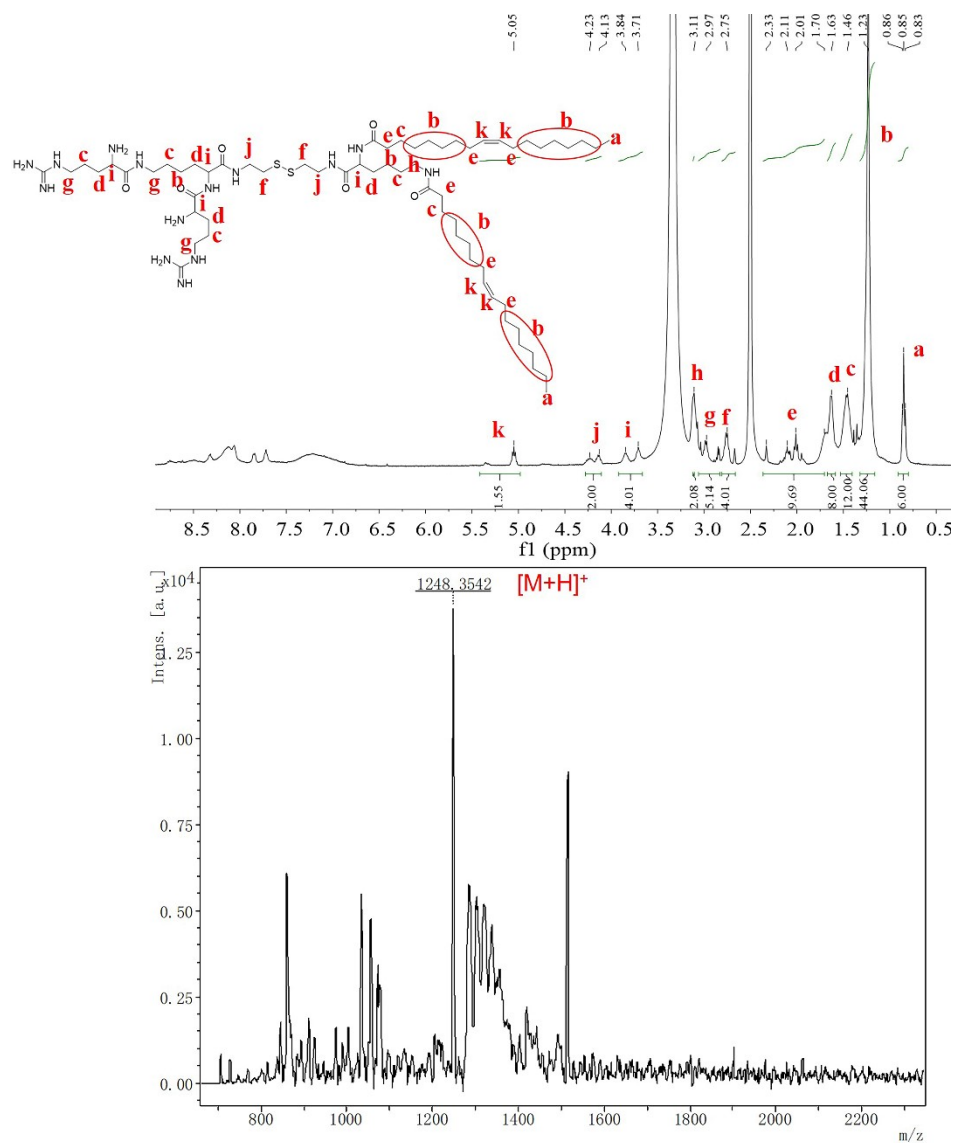

**Figure S17.** (A)  $^1\text{H}$ -NMR of RLS5. (B) MOLDI-TOF-MS of RLS5.

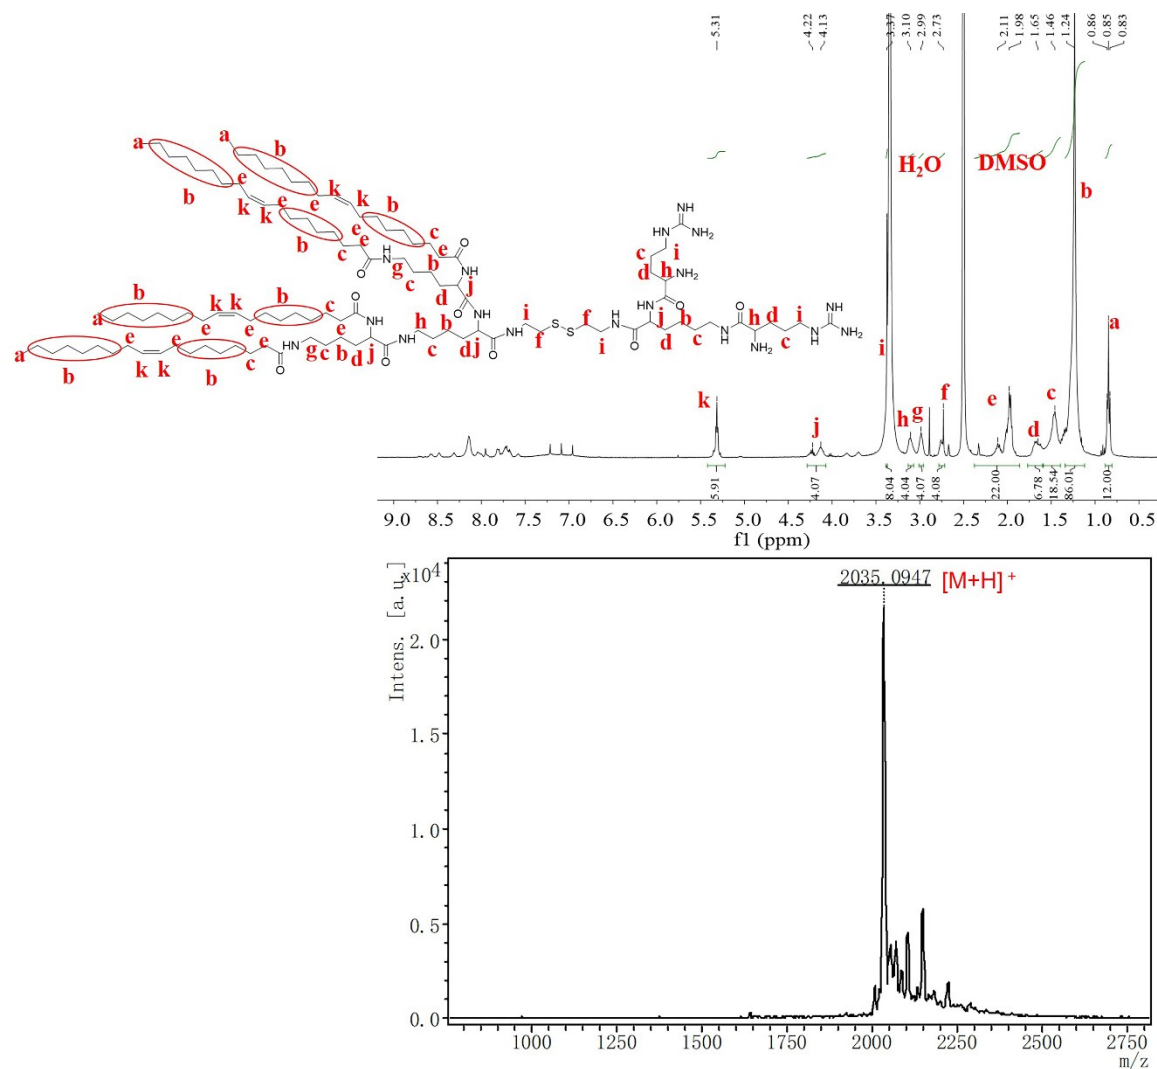

**Figure S18.** (A)  $^1\text{H}$ -NMR of RLS6. (B) MOLDI-TOF-MS of RLS6.

**Table S1.** The particle size, PDI, and  $\zeta$  potential of six lipid assemblies.

|      | Particle size<br>(nm) | PDI             | Zeta potential<br>(mV) |
|------|-----------------------|-----------------|------------------------|
| RLS1 | 140.3 $\pm$ 21.2      | 0.22 $\pm$ 0.02 | 22.2 $\pm$ 3.7         |
| RLS2 | 164.6 $\pm$ 6.8       | 0.24 $\pm$ 0.04 | 24.1 $\pm$ 2.8         |
| RLS3 | 187.7 $\pm$ 12.5      | 0.20 $\pm$ 0.01 | 24.7 $\pm$ 6.1         |
| RLS4 | 212.2 $\pm$ 14.6      | 0.28 $\pm$ 0.04 | 25.5 $\pm$ 3.2         |
| RLS5 | 154.3 $\pm$ 17.2      | 0.19 $\pm$ 0.03 | 26.0 $\pm$ 2.9         |
| RLS6 | 220.2 $\pm$ 5.2       | 0.27 $\pm$ 0.06 | 27.1 $\pm$ 3.9         |

**Table S2.** The encapsulation efficiency of RLS5/mRNA and RLS1-6/pDNA.

|      | N/P | Loaded gene | Total gene weight<br>(ng) | Free gene weight<br>(ng) | Encapsulation efficiency<br>(%) |
|------|-----|-------------|---------------------------|--------------------------|---------------------------------|
| RLS5 | 5   | mRNA        | 200                       | 7.95                     | 96.03                           |
| RLS1 | 20  | pDNA        | 200                       | 9.41                     | 95.43                           |
| RLS2 | 20  | pDNA        | 200                       | 7.71                     | 96.15                           |
| RLS3 | 20  | pDNA        | 200                       | 9.65                     | 95.18                           |
| RLS4 | 20  | pDNA        | 200                       | 5.90                     | 97.05                           |
| RLS5 | 20  | pDNA        | 200                       | 7.22                     | 96.39                           |
| RLS6 | 20  | pDNA        | 200                       | 3.12                     | 98.44                           |

**Table S3.** The particle size of lipid gene complexes after 0, 15, 30, 45, and 60 min of incubation with 10% FBS.

|      | Time (min) | Particle size (nm) | PDI             |      | Time (min) | Particle size (nm) | PDI             |
|------|------------|--------------------|-----------------|------|------------|--------------------|-----------------|
| RLS1 | 0          | 312.4 $\pm$ 20.1   | 0.37 $\pm$ 0.07 | RLS4 | 0          | 234.2 $\pm$ 12.5   | 0.21 $\pm$ 0.02 |
|      | 15         | 459.2 $\pm$ 13.5   | 0.58 $\pm$ 0.12 |      | 15         | 242.4 $\pm$ 31.9   | 0.13 $\pm$ 0.07 |
|      | 30         | 791.1 $\pm$ 106.1  | 0.91 $\pm$ 0.09 |      | 30         | 228.9 $\pm$ 19.2   | 0.25 $\pm$ 0.04 |
|      | 45         | 590.9 $\pm$ 55.7   | 0.51 $\pm$ 0.04 |      | 45         | 247.6 $\pm$ 25.7   | 0.27 $\pm$ 0.03 |
|      | 60         | 860.3 $\pm$ 69.6   | 0.72 $\pm$ 0.13 |      | 60         | 239.2 $\pm$ 11.4   | 0.24 $\pm$ 0.05 |
| RLS2 | 0          | 224.3 $\pm$ 22.7   | 0.28 $\pm$ 0.03 | RLS5 | 0          | 198.2 $\pm$ 7.8    | 0.21 $\pm$ 0.05 |
|      | 15         | 327.6 $\pm$ 47.3   | 0.53 $\pm$ 0.09 |      | 15         | 201.5 $\pm$ 13.6   | 0.24 $\pm$ 0.03 |
|      | 30         | 401.5 $\pm$ 19.1   | 0.41 $\pm$ 0.11 |      | 30         | 199.4 $\pm$ 2.3    | 0.18 $\pm$ 0.05 |
|      | 45         | 499.9 $\pm$ 59.4   | 0.45 $\pm$ 0.21 |      | 45         | 206.7 $\pm$ 18.1   | 0.20 $\pm$ 0.06 |
|      | 60         | 377.1 $\pm$ 20.1   | 0.60 $\pm$ 0.07 |      | 60         | 193.1 $\pm$ 12.6   | 0.27 $\pm$ 0.08 |
| RLS3 | 0          | 246.1 $\pm$ 31.2   | 0.23 $\pm$ 0.04 | RLS6 | 0          | 254.7 $\pm$ 15.6   | 0.31 $\pm$ 0.05 |
|      | 15         | 375.2 $\pm$ 12.0   | 0.48 $\pm$ 0.02 |      | 15         | 262.3 $\pm$ 28.3   | 0.28 $\pm$ 0.04 |
|      | 30         | 267.5 $\pm$ 41.9   | 0.44 $\pm$ 0.10 |      | 30         | 230.9 $\pm$ 12.7   | 0.33 $\pm$ 0.07 |
|      | 45         | 321.6 $\pm$ 43.2   | 0.21 $\pm$ 0.07 |      | 45         | 238.1 $\pm$ 8.7    | 0.25 $\pm$ 0.06 |
|      | 60         | 348.9 $\pm$ 69.8   | 0.77 $\pm$ 0.47 |      | 60         | 257.9 $\pm$ 17.9   | 0.30 $\pm$ 0.01 |
